# Supplementary material for: Platinum–TM (TM = Fe, Co) alloy nanoparticles dispersed nitrogen doped (reduced graphene oxide-multiwalled carbon nanotube) hybrid structure cathode electrocatalysts for high performance PEMFC applications
Source: Royal Society of Chemistry journal article supplement (doi:10.1039/c3nr00585b), 2013-01-01
Supplement: c3nr00585b.pdf [file c3nr00585b.pdf]

## Supporting information

**Platinum-TM (TM=Fe, Co) alloy nanoparticles dispersed nitrogen doped (reduced graphene oxide-multiwalled carbon nanotube) hybrid structure cathode electrocatalysts for high performance PEMFC applications**

*B. P. Vinayan and S. Ramaprabhu\**

Alternative Energy and Nanotechnology Laboratory (AENL), Nano Functional Materials  
Technology Centre (NFMTC), Department of Physics, Indian Institute of Technology Madras,  
Chennai 600036, India

Phone: +91-44-22574862, Fax: +91-44-22570509/22574852

\*Email: [ramp@iitm.ac.in](mailto:ramp@iitm.ac.in)

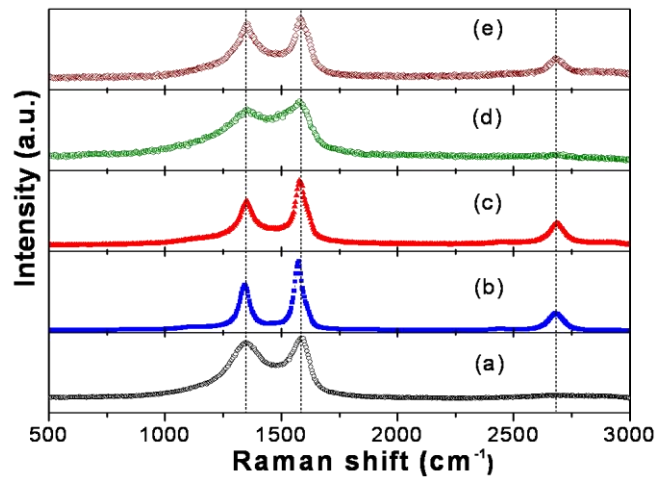

**Figure S1:** Raman spectra for (a) rGO, (b) MWNTs, (c) (*pG - f*-MWNTs), (d) PPy-(*pG - f*-MWNTs), and (e) *N*-(G-MWNTs).

**Table S1:** The  $I_D/I_G$  ratios tabulated for different samples determined from their corresponding Raman spectra.

| Sample name                 | $I_D/I_G$ |
|-----------------------------|-----------|
| rGO                         | 0.89      |
| MWNTs                       | 0.66      |
| <i>pG - f</i> -MWNTs        | 0.67      |
| PPy-( <i>pG - f</i> -MWNTs) | 0.72      |
| <i>N</i> -(G-MWNTs)         | 0.97      |

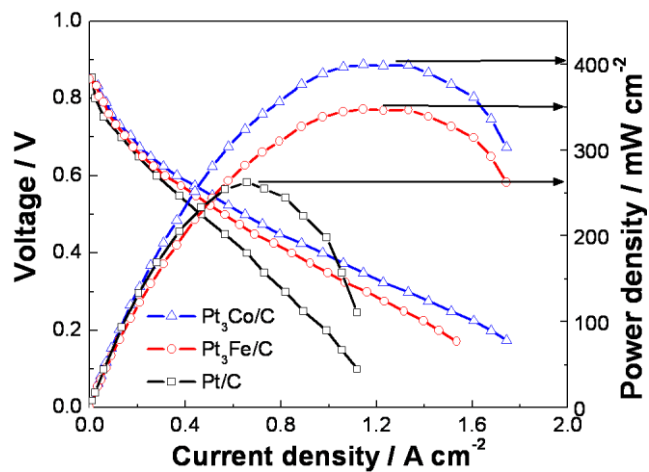

**Figure S2:** Polarization curves of cathode electrocatalysts commercial Pt/C, Pt<sub>3</sub>Fe/C, Pt<sub>3</sub>Co/C with Pt/C as the anode electrocatalyst at 60 °C without any back pressure.
